# Supplementary material
Source: PubMed Central journal article supplement (PMC10082356)
Supplement: BLOOD_BLD-2022-017667-mmc1.pdf [file BLOOD_BLD-2022-017667-mmc1.pdf]

**Suppl Table 1:** Conditioning regimens

**Suppl Table 2:** V(D)J recombination activity in cohort of hypomorphic RAG deficient patients

**Suppl Table 3:** Autoimmune manifestations before HSCT and outcome after HSCT

**Suppl Table 4:** Details on organ damage prior HSCT

**Suppl Table 5:** Details of T-cell depleted grafts

**Suppl Table 6:** OS – variable importance for OS (random forest)

**Suppl Table 7:** Determinants for Ig substitution

**Suppl Figure 1** – Violin plot of age distribution at HSCT

**Suppl Figure 2** - T-cell reconstitution by CR, A: age-adapted CD4<sup>+</sup> T-cells, B: age-adapted CD45RA<sup>+</sup> T-cells

**Suppl Figure 3** – cumulative incidence of immunoglobulin discontinuation post HSCT

**Suppl Table 1: Conditioning regimens**

| <b>conditioning</b>     | <b>total per group n=</b> |                      | <b>n=</b> |
|-------------------------|---------------------------|----------------------|-----------|
| <b>MAC</b>              | 19                        | BU*/Flu              | 5         |
|                         |                           | BU/CY                | 4         |
|                         |                           | BU/Flu/TT            | 4         |
|                         |                           | Flu/mel/TT           | 3         |
|                         |                           | Flu/TBI              | 1         |
|                         |                           | Treo/Flu/TT          | 2         |
|                         |                           |                      |           |
| <b>Reduced Toxicity</b> | 23                        | BU**/Flu             | 12        |
|                         |                           | Treo (36-42g/kg)/Flu | 11        |
| <b>RIC/NMA</b>          | 18                        | BU < 8 mg/kg/low CY  | 5         |
|                         |                           | Flu/Mel              | 5         |
|                         |                           | Flu/Mel/RIT          | 1         |
|                         |                           | reduced Treo/Flu     | 3         |
|                         |                           | reduced Treo/Flu/RIT | 2         |
|                         |                           | Flu/RIT              | 1         |
|                         |                           | Flu                  | 1         |
|                         |                           |                      |           |

MAC denotes myeloablative conditioning, RIC: reduced intensity conditioning, BU: busulfan, Flu: fludarabine, CY: cyclophosphamide, TT: thiotepa, TBI: total body irradiation, Treo: treosulfan, RIT: radio-immunotherapy, BU\* : myeloablative dose of busulfan as defined by IEWP guidelines; BU\*\* : reduced dose of busulfan as defined by IEWP guidelines: BU\* administered under therapeutic drug monitoring (TDM), i.e. AUC >80 mg\*h/L (doses >12mg/kg); BU\*\* administered under TDM: 60-70 mg\*h/L.

**Suppl Table 2** V(D)J recombination activity by genetic variants in *RAG1* or *RAG2* genes in cohort of hypomorphic RAG deficient patients

| affected gene | allele 1    | % VDJ activity | allele 2    | % VDJ activity | functionality by class |
|---------------|-------------|----------------|-------------|----------------|------------------------|
| RAG1          | p.R108X     | 1,8            | p.R404Q     | 1,2            | 3                      |
| RAG1          | p.R108X     | 1,8            | p.R108X     | 1,8            | 3                      |
| RAG1          | p.R507Q     | 10,1           | p.R507Q     | 10,1           | 3                      |
| RAG1          | p.R410W     | 0,0            | p.R507Q     | 10,1           | 3                      |
| RAG1          | p.R561H     | 5,2            | p.R759C     | 17,2           | 3                      |
| RAG1          | p.K86VfsX33 | 2,7            | p.K86VfsX33 | 2,7            | 3                      |
| RAG1          | p.N855S     | 11,7           | p.K992E     | 9,1            | 3                      |
| RAG1          | p.K86fsX33  | 2,7            | p.R559S     | 1,0            | 3                      |
| RAG1          | p.R229L     | 7,3            | p.G319X     | 1,6            | 3                      |
| RAG1          | p.K86VfsX33 | 2,7            | p.K86VfsX33 | 2,7            | 3                      |
| RAG1          | p.R841W     | 10,0           | p.R841W     | 10,0           | 3                      |
| RAG1          | p.I956T     | 3,5            | p.I956T     | 3,5            | 3                      |
| RAG1          | p.R716Q     | 0,0            | p.N855S     | 11,7           | 3                      |
| RAG1          | p.R975W     | 3,7            | p.R778Q     | 2,3            | 3                      |
| RAG1          | p.H612R     | 6,3            | p.H612R     | 6,3            | 3                      |
| RAG1          | p.M183R     | 23,1           | p.V779M     | 1,3            | 3                      |
| RAG1          | p.R108X     | 1,8            | p.R108X     | 1,8            | 3                      |
| RAG1          | p.R507Q     | 10,1           | p.R507Q     | 10,1           | 3                      |
| RAG1          | p.T708A     | 24,7           | p.E669K     | 0,2            | 3                      |
| RAG1          | p.R314W     | 24,3           | p.R737H     | 0,2            | 3                      |
| RAG1          | p.E193K     | 48,4           | p.E193K     | 48,4           | 2                      |
| RAG1          | p.R142X     | 9,0            | p.T477S     | 72,5           | 2                      |
| RAG1          | p.R973H     | 32,0           | p.R973H     | 32,0           | 2                      |
| RAG1          | p.S480G     | 60,1           | p.S480G     | 60,1           | 2                      |
| RAG1          | p.K86fs*    | 2,7            | p.M573K     | 27,7           | 2                      |
| RAG1          | p.R112L     | 42,1           | p.H735Q     | 0,2            | 2                      |
| RAG1          | p.H375D     | 40,4           | p.Y562C     | 0,0            | 2                      |
| RAG1          | p.R410W     | 0,0            | p.H375D     | 40,4           | 2                      |
| RAG1          | p.R474H     | 57,8           | p.R559S     | 1,0            | 2                      |
| RAG1          | p.R112H     | 41,0           | p.R410W     | 0,0            | 2                      |
| RAG1          | p.W204X     | 0,4            | p.W522C     | 41,6           | 2                      |
| RAG1          | p.W522C     | 41,6           | p.R975Q     | 57,9           | 2                      |
| RAG1          | p.C363Y     | 45,3           | p.R396C     | 0,6            | 2                      |
| RAG1          | p.R973C     | 0,0            | p.W522C     | 41,6           | 2                      |
| RAG1          | p.R108X     | 1,8            | p.W522C     | 41,6           | 2                      |
| RAG1          | p.R112H     | 41,0           | p.C328Y     | 16,0           | 2                      |
| RAG1          | p.W204X     | 0,4            | p.W522C     | 41,6           | 2                      |
| RAG1          | p.A472BV    | 0,4            | p.H612R     | 134,0          | 1                      |
| RAG1          | p.R474C     | 109,2          | p.Y768X     | 0,0            | 1                      |
| RAG1          | p.R410Q     | 0,0            | p.H612R     | 134,0          | 1                      |
| RAG1          | p.R474C     | 109,2          | p.K983NfsX9 | 0,1            | 1                      |

|      |             |       |             |       |   |
|------|-------------|-------|-------------|-------|---|
| RAG1 | p.K86VfsX33 | 2,7   | p.H612R     | 134,0 | 1 |
| RAG1 | p.R474C     | 109,2 | p.R624H     | 0,0   | 1 |
| RAG1 | p.R474C     | 109,2 | p.K983NfsX9 | 0,1   | 1 |
| RAG1 | p.R474C     | 109,2 | p.K983NfsX9 | 0,1   | 1 |

| affected gene | allele 1 | % VDJ activity | allele 2 | % VDJ activity | functionality by class |
|---------------|----------|----------------|----------|----------------|------------------------|
| RAG2          | p.S447C  | 9,9            | p.S447C  | 9,9            | 3                      |
| RAG2          | p.G35A   | 22,1           | p.A456D  | 0,1            | 3                      |
| RAG2          | p.A456V  | 19,5           | p.A456V  | 19,5           | 3                      |
| RAG2          | p.G35A   | 22,1           | p.G35A   | 22,1           | 3                      |
| RAG2          | p.407X   | 2,9            | p.p.407X | 2,9            | 3                      |
| RAG2          | p.N173S  | 47,5           | p.E437K  | 0,9            | 2                      |
| RAG2          | p.T77N   | 21,7           | p.G451A  | 27,6           | 2                      |
| RAG2          | p.G451A  | 66,3           | p.I210T  | 57,6           | 2                      |
| RAG2          | p.Y453R  | 0,6            | p.P305R  | 30,9           | 2                      |
| RAG2          | p.P305R  | 30,9           | p.M459L  | 30,8           | 2                      |
| RAG2          | p.G35V   | 0,4            | p.M322T  | 55,1           | 2                      |

1 (green) = normal/possibly reduced: at least one allele >75%; 2 (yellow) = reduced: at least one allele >25-75%; 3 (orange) = severely reduced: both alleles <25%.

**Suppl Table 3: Autoimmune manifestations before HSCT and outcome after HSCT**

| <b>Autoimmune manifestations:</b>                                    | <b>Outcome after HSCT</b>                          |
|----------------------------------------------------------------------|----------------------------------------------------|
| <b><i>Autoimmune cytopenia (n= 50 in 33 patients)</i></b>            | <i>resolved</i>                                    |
| AIHA n= 21                                                           |                                                    |
| ITP n= 15                                                            |                                                    |
| AI neutropenia n= 13                                                 |                                                    |
| Pure Red blood cell aplasia n= 1                                     |                                                    |
| <b><i>Other autoimmune manifestations (n= 41 in 21 patients)</i></b> |                                                    |
| <b>SKIN:</b>                                                         |                                                    |
| Dermatitis n= 7                                                      | resolved n= 5, NA n= 2                             |
| Vitiligo n= 7                                                        | resolved n= 1, improved n= 2, stable n= 2, NA n= 1 |
| Alopecia areata n= 6                                                 | resolved n= 4, NA n= 2                             |
| <b>NEURO-MUSCULAR SYSTEM:</b>                                        |                                                    |
| Myositis n= 3                                                        | improved n= 1, NA n= 2                             |
| Myasthenia gravis n= 2                                               | resolved n= 1, NA n= 1                             |
| Arthritis n= 1                                                       | NA                                                 |
| AI encephalitis n= 1                                                 | non active at HSCT                                 |
| Fascitis n= 1                                                        | NA                                                 |
| <b>GASTRO-INTESTINAL TRACT:</b>                                      |                                                    |
| Colitis n= 7                                                         | resolved n= 5, NA n= 2                             |
| duodenitis n= 1                                                      | resolved                                           |
| panceatitis n=1                                                      | resolved                                           |
| <b>OTHERS</b>                                                        |                                                    |
| Uveitis n= 1                                                         | relapse after HSCT, then resolved                  |
| interstitial lung disease n= 1                                       | resolved                                           |
| Glomerulonephritis n= 1                                              | NA                                                 |
| Intra-cerebral vasculitis n= 1                                       | resolved                                           |

*Numbers of autoimmune manifestations per patient: n=16: one manifestation per patient; n=17: two; n=3: three; n=3: four; n=4: five.*

**Suppl Table 4:** Details on organ damage prior HSCT

| <b>organ damage at HSCT</b> | <b>n</b> | <b>etiology</b>                                                                              | <b>n</b> |
|-----------------------------|----------|----------------------------------------------------------------------------------------------|----------|
| lung                        | 30       | chronic bronchitis                                                                           | 6        |
|                             |          | bronchiectasia                                                                               | 6        |
|                             |          | bronchiectasia and restrictive disease                                                       | 1        |
|                             |          | restrictive disease                                                                          | 2        |
|                             |          | obstructive and restrictive disease                                                          | 3        |
|                             |          | pneumonitis                                                                                  | 1        |
|                             |          | post viral pneumonitis (mosaic attenuation)                                                  | 1        |
|                             |          | immune pneumonitis                                                                           | 1        |
|                             |          | sequelae following severe/recurrent infections                                               | 2        |
|                             |          | granulomatous–lymphocytic interstitial lung disease (GLILD)                                  | 1        |
|                             |          | not otherwise specified                                                                      | 6        |
| liver                       | 10       | viral hepatitis (CMV, varicella)                                                             | 3        |
|                             |          | cryptosporidium/sclerosing cholangitis                                                       | 1        |
|                             |          | recurrent infections                                                                         | 1        |
|                             |          | severe hepatitis with CD8+ infiltration                                                      | 1        |
|                             |          | chronic hepatitis                                                                            | 1        |
|                             |          | hepatic granuloma                                                                            | 1        |
|                             |          | iron overload                                                                                | 1        |
|                             |          | cholestasis (post hemophagocytic lymphohistiocytosis)                                        | 1        |
| kidney                      | 6        | post-dialysis nephropathy (following life-threatening varicella infection)                   | 1        |
|                             |          | autoimmune glomerulonephritis with sclerosis                                                 | 1        |
|                             |          | tubular injury following recurrent hemolysis (intermittent hematuria, low grade proteinuria) | 1        |
|                             |          | not otherwise specified                                                                      | 3        |
| other                       | 9        | enterocolitis                                                                                | 4        |
|                             |          | peridontitis/recurrent mouth ulcers, recurrent episodes of diarrhea                          | 1        |
|                             |          | persistent norovirus infection                                                               | 1        |
|                             |          | pancreatitis                                                                                 | 1        |
|                             |          | persistent steroid-induced diabetes                                                          | 1        |
|                             |          | epilepsy (cerebral vasculitis)                                                               | 1        |

Suppl Table 5: Details of T-cell depleted grafts

| patient ID                      | 4         | 7           | 10     | 27     | 41           | 43        | 49            | 69        | 22        | 25           | 26       | 38              | 42    | 52        | 68        |           |
|---------------------------------|-----------|-------------|--------|--------|--------------|-----------|---------------|-----------|-----------|--------------|----------|-----------------|-------|-----------|-----------|-----------|
| EBMT CIC                        | 204       | 204         | 913    | 201    | 243          | 209       |               |           | 201       | 201          | 201      | 243             | 243   |           |           |           |
| sex                             | f         | m           | f      | f      | m            | f         | m             | f         | m         | m            | f        | m               | f     | f         | f         |           |
| RAG 1 or 2                      | 1         | 1           | 2      | 2      | 1            | 1         | 1             | 1         | 1         | 1            | 1        | 2               | 2     | 1         | 1         |           |
| age (mo) 1st symptom            | 8.5       | 17.5        | 18     | 11.5   | 12.5         | 10        | 66.5          | 16        | 16.5      | 63           | 150      | 18              | NA    | 2         | 6         |           |
| age at HSCT (y)                 | 8.5       | 8.5         | 2.7    | 1.5    | 2.3          | 1.5       | 16.8          | 3.2       | 3         | 16.8         | 10       | 7.3             | 2.8   | 0.8       | 1.1       |           |
| active infection at HSCT        | Y         | Y           | Y      | Y      | Y            | Y         | Y             | Y         | n         | n            | n        | n               | n     | n         | n         | n         |
| donor                           | MUD       | MMFD        | MMFD   | MMUD   | MMFD         | MMFD      | MMFD          | MUD       | MUD       | MUD          | MUD      | MMUD            | MMFD  | MMFD      | MMFD      | MFD       |
| conditioning                    | RIC       | MAC         | RTC    | MAC    | RTC          | RTC       | RTC           | MAC       | MAC       | MAC          | MAC      | RIC             | RIC   | RTC       | MAC       | MAC       |
| type of T-cell depletion        | CD34      | TCRab       | TCRab  | CD45RA | CD34         | CD34      | CD34          | TCRab     | CD45RA    | CD45RA       | CD45RA   | CD34/addback    | TCRab | TCRab     | TCRab     | TCRab     |
| serotherapy                     | ATG       | ATG         | ATG    | ATG    | none         | alemntuz. | alemntuz.     | ATG       | alemntuz. | alemntuz.    | ATG      | alemntuz.       | ATG   | ATG       | ATG       | ATG       |
| donor cell engraftment          | 100       | 0           | NA     | 85     | 100          | 100       | 100           | NA        | 100       | 100          | 100      | NA              | 100   | 35        | NA        | NA        |
| autoimmunity pre HSCT           | 0         | 1           | 1      | 0      | 1            | 1         | 1             | 1         | 0         | 1            | 1        | 1               | 0     | 0         | 0         | 0         |
| autoimmunity resolved post HSCT | NA        | NA          | NA     | NA     | Y            | NA        | NA            | NA        | NA        | NA           | improved | NA              | NA    | NA        | NA        | NA        |
| granuloma pre HSCT              | 1         | 0           | 0      | 0      | 0            | 0         | 0             | 0         | 1         | 1            | 0        | 0               | 0     | 0         | 0         | 0         |
| granuloma resolved post HSCT    | Y         | NA          | NA     | NA     | NA           | NA        | NA            | NA        | Y         | Y            | NA       | NA              | NA    | NA        | NA        | NA        |
| new onset/relapse autoimmunity  | n         | NA          | NA     | Y      | n            | NA        | NA            | NA        | Y         | Y            | Y        | NA              | n     | NA        | NA        | NA        |
| AI entity                       |           |             |        |        |              |           |               |           | AIHA      |              | myositis |                 |       |           |           |           |
| AI entity survival              | n         | n           | n      | Y      | n            | n         | n             | n         | Y         | AIHA         | Basedow  | n               | Y     | n         | n         | n         |
| time to death post HSCT (mo)    | 26        | 9           | 0.3    | NA     | 41           | 6         | 2             | 0         | NA        | 46           | NA       | 0               | NA    | 7         | 1         | 1         |
| cause of death                  | GvHD/inf. | graft fail. | sepsis | NA     | encephalitis | infection | p. hemorrhage | infection | NA        | autoimmunity | NA       | viral infection | NA    | infection | infection | infection |

alemntuz=alemntuzumab

NA=not applicable

p.=pulmonary

**Suppl Table 6:** OS – variable importance for OS (random forest)

| Variable                                     | Variable importance |
|----------------------------------------------|---------------------|
| > 12 months between birth and diagnosis      | 0.1320875           |
| VDJ-activity > 75% in at least one allele    | 0.2224135           |
| age at HSCT < 3.5 years                      | 0.3164747           |
| autoimmunity and/or granuloma at HSCT        | 0.3902234           |
| infection prior to HSCT                      | 0.5286125           |
| active autoimmunity and/or granuloma at HSCT | 0.6836633           |
| active infection at HSCT                     | 0.9210747           |
| organ damage prior to HSCT                   | 1.1368471           |
| mismatched family donor (MMFD)               | 1.7044517           |
| T-cell depletion                             | 2.3940849           |



**Suppl Table 7:** Determinants for Immunglobulin (Ig) substitution

| Variable                             | Ig substitution, n(%) |           | OR (univariable)* |                             |
|--------------------------------------|-----------------------|-----------|-------------------|-----------------------------|
|                                      | no                    | yes       |                   |                             |
| infection prior to HSCT              | no                    | 11 (29.7) | 1 (9.1)           | -                           |
|                                      | yes                   | 26 (70.3) | 10 (90.9)         | 4.23 (0.68-82.44, p=0.193)  |
| autoimmunity prior to HSCT           | no                    | 15 (40.5) | 1 (9.1)           | -                           |
|                                      | yes                   | 22 (59.5) | 10 (90.9)         | 6.82 (1.13-131.86, p=0.081) |
| organ damage prior to HSCT           | no                    | 18 (48.6) | 4 (36.4)          | -                           |
|                                      | yes                   | 19 (51.4) | 7 (63.6)          | 1.66 (0.43-7.24, p=0.475)   |
| age at transplantation < 3.5 years   | no                    | 19 (51.4) | 6 (54.5)          | -                           |
|                                      | yes                   | 18 (48.6) | 5 (45.5)          | 0.88 (0.22-3.42, p=0.852)   |
| myeloablative conditioning (MAC)     | no                    | 25 (67.6) | 8 (72.7)          | -                           |
|                                      | yes                   | 12 (32.4) | 3 (27.3)          | 0.78 (0.15-3.27, p=0.746)   |
| reduced intensity conditioning (RIC) | no                    | 25 (67.6) | 8 (72.7)          | -                           |
|                                      | yes                   | 12 (32.4) | 3 (27.3)          | 0.78 (0.15-3.27, p=0.746)   |
| reduced toxicity conditioning (RTC)  | no                    | 24 (64.9) | 6 (54.5)          | -                           |
|                                      | yes                   | 13 (35.1) | 5 (45.5)          | 1.54 (0.38-6.10, p=0.536)   |

\* OR = Odd's ratio (95% confidence interval)

### age distribution at HSCT

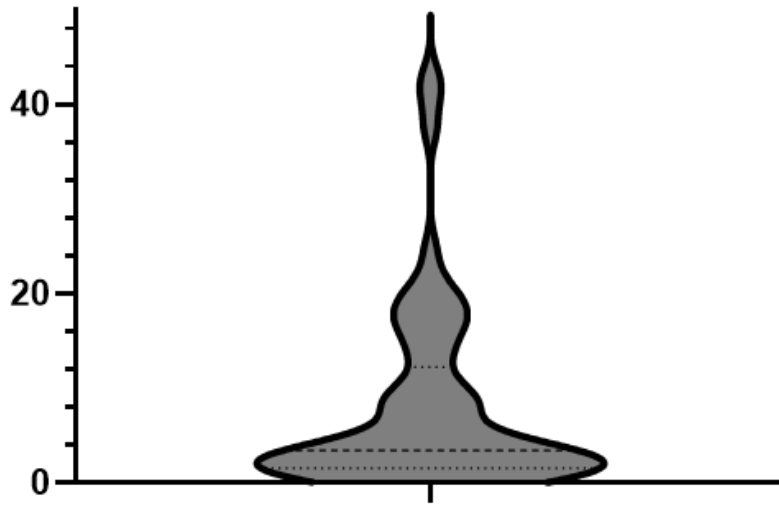

Suppl Figure 1 – Violin plot of age distribution at HSCT

Suppl. Fig. 2A - CD4<sup>+</sup> T-cell reconstitution

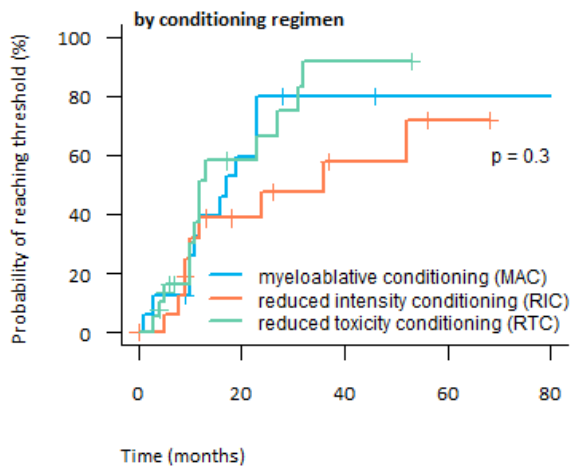

Suppl. Fig. 2B - CD4<sup>+</sup>CD45RA<sup>+</sup> T-cell reconstitution

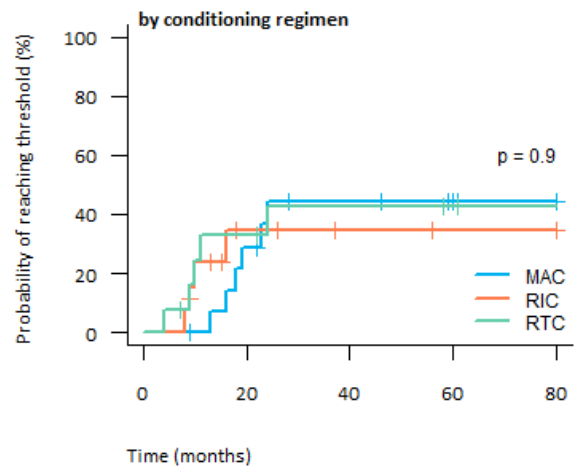

**Suppl. Figure 2** - T-cell reconstitution by Conditioning regimen, **A**: age-adapted CD4<sup>+</sup> T-cells, **B**: age-adapted CD45RA<sup>+</sup> T-cells.

**Suppl. Figure 3 - Cumulative incidence of immunoglobulin discontinuation post HSCT**

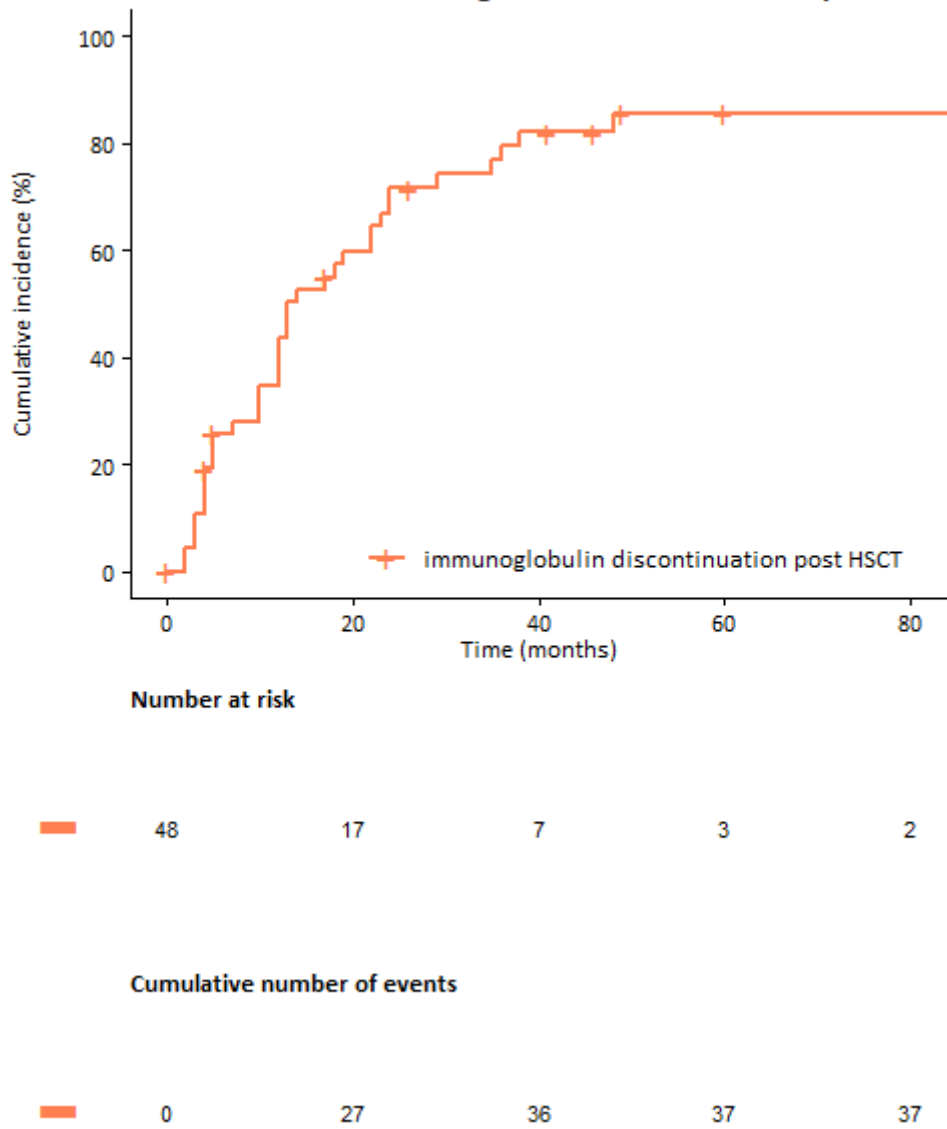

**Suppl Figure 3**– Cumulative incidence of immunoglobulin discontinuation post HSCT.
